# Supplementary material
Source: Springer Nature journal article supplement (https://www.springermedizin.de/resource/supplementary/12914_2013_287_MOESM4_ESM.pdf/9537236)

**Figure A1. Flow diagram of study design**

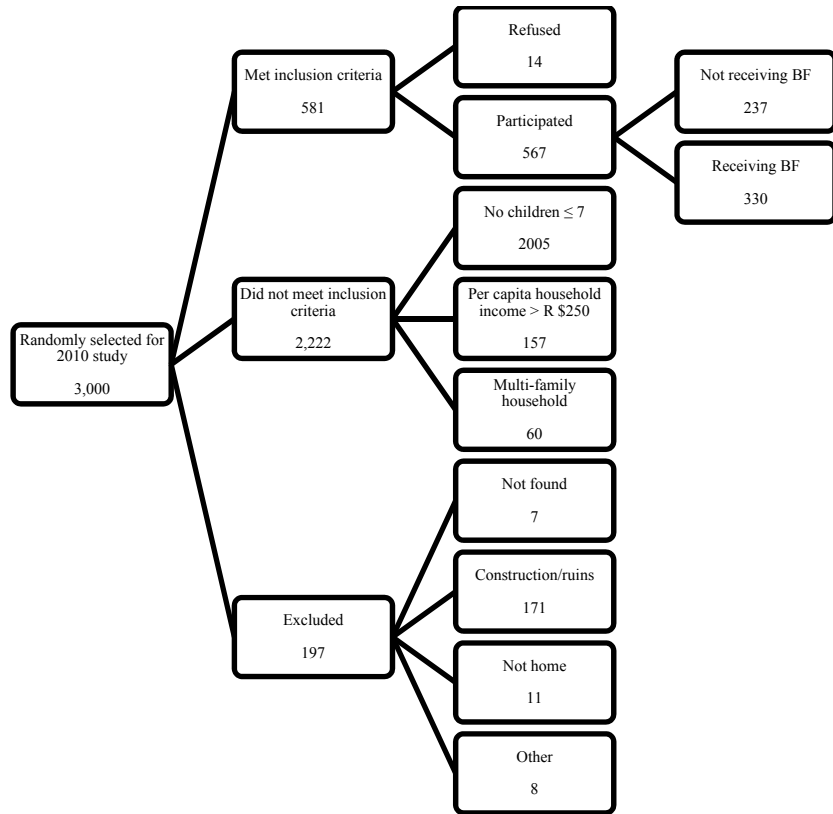

Supplement: MOESM4 [file 9537236]
